# Supplementary material for: Unravelling the coupling of surface plasmons in carbon nanotubes by near-field nanoscopy
Source: Royal Society of Chemistry journal article supplement (doi:10.1039/d1nr02346b), 2021-01-01
Supplement: d1nr02346b1.pdf [file d1nr02346b1.pdf]

### Supplementary Information

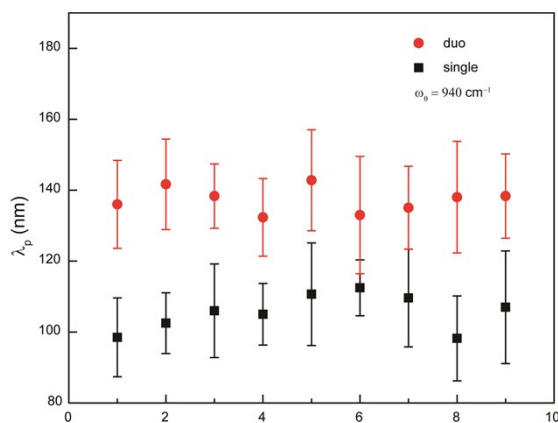

Figure S1: Plasmon wavelengths of single (Black dots) and duo (Red dots) carbon nanotubes systems for different samples with  $940\text{ cm}^{-1}$  photon.

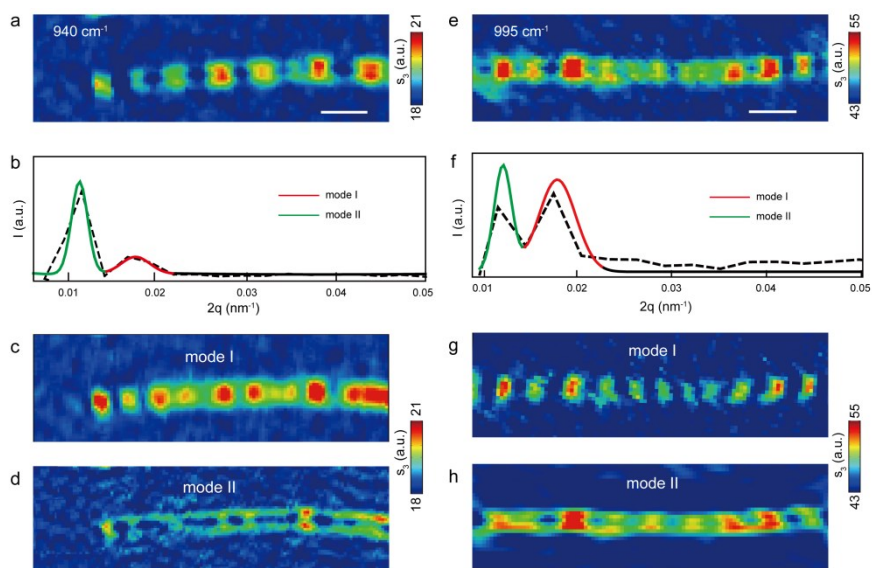

Figure S2: FFT of the near-field optical images in DCNTs. a, e) Infrared near-field optical images of duo nanotubes with  $940$  and  $995\text{ cm}^{-1}$  photon excitation, respectively. b, f) FFT spectrum of near-field optical images of DCNTs corresponding to (a) and (e), respectively. The two peaks are marked as modes I and II. The dotted and solid lines are the experimental data and fitting results, respectively. c-h) Amplitude images obtained by inverse Fourier transform for the two peaks in (b) and (f).
